# Supplementary material for: Chestnut Shell Tannins: Effects on Intestinal Inflammation and Dysbiosis in Zebrafish
Source: MDPI journal article supplement (doi:10.3390/ani11061538), 2021-05-25
Supplement: s1 [file s1]

# Supplementary Materials:

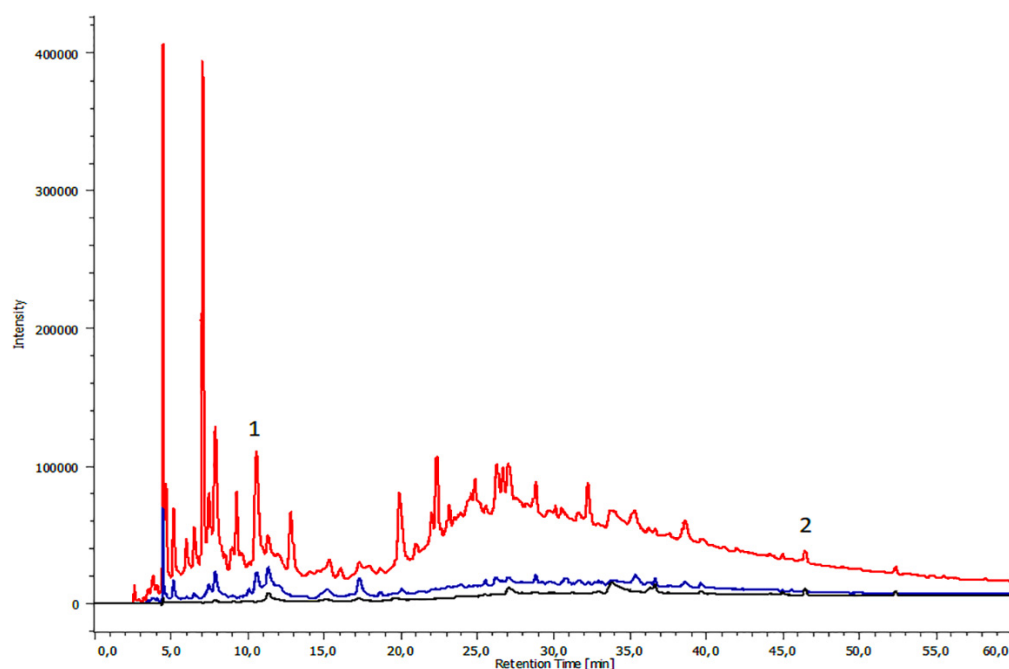

**Figure S1:** Chromatographic separation (HPLC/DAD) of chestnut shell extract monitoring at the wavelengths of 275 (red line), 325 (blue line), and 375 (black line) nm. The numbers indicate the following molecules: gallic acid (1), ellagic acid (2).

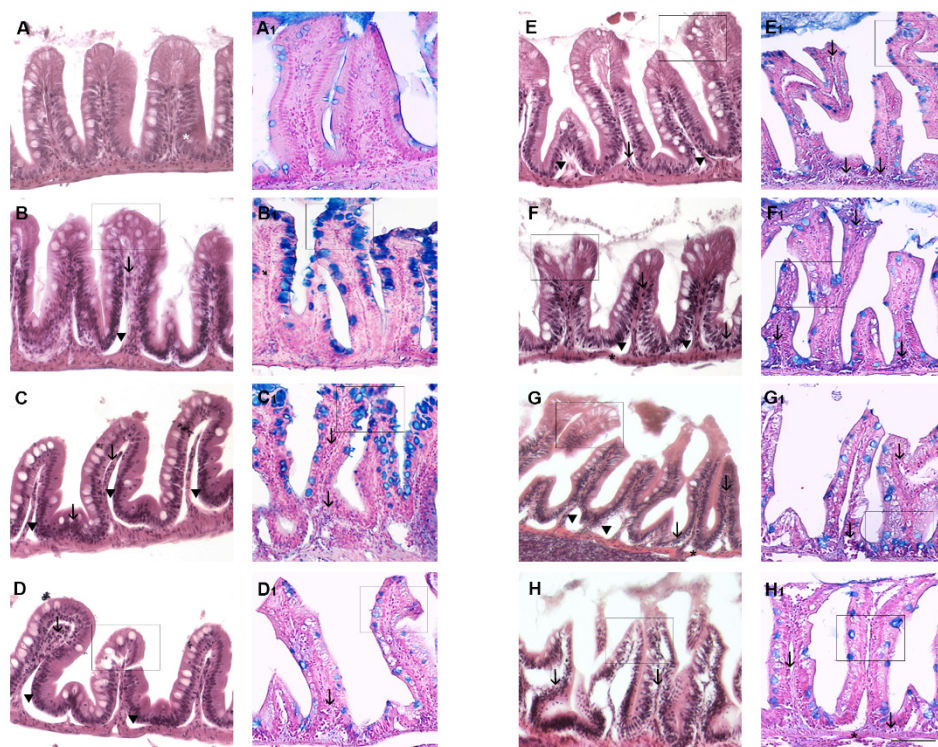

**Figure S2:** Hematoxylin-eosin (H&E) (A–D; E–H) and Alcian Blu (A<sub>1</sub>–D<sub>1</sub>; E<sub>1</sub>–H<sub>1</sub>) staining of MI of control zebrafish and zebrafish fed with *Artemia salina* with and without k-carrageenan. (A–

A<sub>1</sub>) MI of control zebrafish. (B–B<sub>1</sub>) MI of zebrafish fed for 3 days with 0.05% of K-carrageenan. (C–C<sub>1</sub>) MI of zebrafish fed for 3 days with 0.1% of K-carrageenan. (D–D<sub>1</sub>) MI of zebrafish fed for 10 days with 0.05% of K-carrageenan. (E–E<sub>1</sub>) MI of zebrafish fed for 10 days with 0.1% of K-carrageenan. (F–F<sub>1</sub>) MI of zebrafish fed for 14 days with 0.1% of K-carrageenan. (G–G<sub>1</sub>) MI of zebrafish fed for 14 days with 1% of K-carrageenan. (H–H<sub>1</sub>) MI of zebrafish fed for 28 days with 1% of K-carrageenan. Scale bar: 100 µm. Arrows indicate leucocytes infiltrates, arrowheads indicate ragged villi, asterisks indicate mucosal thinning, boxes display increased number of goblet cells.

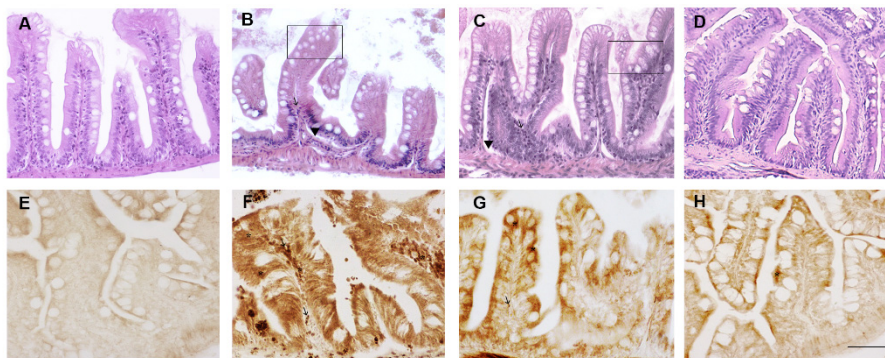

**Figure S3:** Haematoxylin-eosin (H&E) staining (A–D) and TNFα immunostaining (E–H) of intestine of control, inflamed (zebrafish fed for 10 days with 0.1% of K-carrageenan) and CSE (zebrafish fed with 0.4 or 4% chestnut shell extract) zebrafish. (A) and (E) Intestine of control zebrafish. (B) and (F) Intestine of inflamed zebrafish. (C) and (G) Intestine of inflamed zebrafish followed by 0.4% of CSE. (D) and (H) Intestine of inflamed zebrafish followed by 4% of CSE. Scale bar: 100 µm for A–D; 50 µm for E–H. Arrows indicate leucocytes infiltrates, arrowheads indicate ragged villi, boxes display increased number of goblet cells, asterisks indicate TNFα immunosignal.

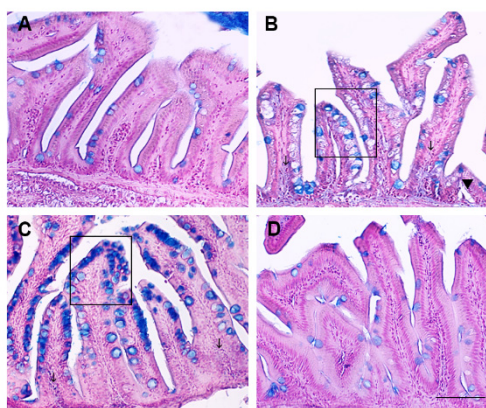

**Figure S4:** Alcian blu staining of intestine of (A) control zebrafish (C), (B) Inflamed zebrafish (I), (C) inflamed zebrafish post-treated with chestnut shell extract (CSEpostI) and (D) zebrafish fed with chestnut shell extract (CSE). Arrows indicate leucocytes infiltrates, arrowheads indicate ragged villi, boxes display increased number of goblet cells.

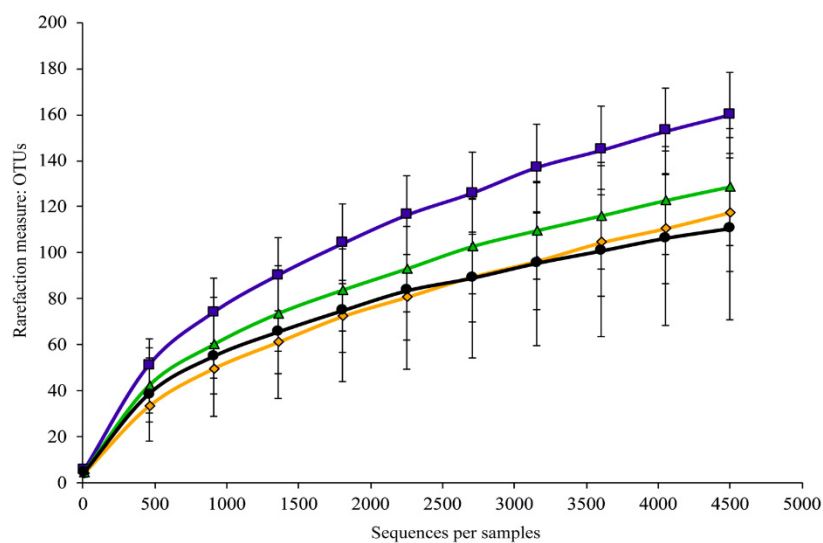

**Figure S5:** The rarefaction curves for microbiota community from intestine of control zebrafish (C), Inflamed zebrafish (I), inflamed zebrafish post-treated with chestnut shell extract (CSEpostI) and zebrafish fed with chestnut shell extract (CSE). ■ - C; ♦ - I; ▲ - CSE; ● - CSEpostI.

**Table S1:** Culturable microbiota in zebrafish (*Danio rerio*) fed on standard control diet and proinflammatory and polyphenolic diets.

| Microbial groups                  | Log CFU g <sup>-1</sup> |             |             |             |
|-----------------------------------|-------------------------|-------------|-------------|-------------|
|                                   | C                       | I           | CSE         | CSEpostI    |
| Total microorganisms              | 7.14 ± 0.09             | 7.22 ± 0.01 | 8.78 ± 0.01 | 8.49 ± 0.04 |
| Total aerobic mesophilic bacteria | 6.95 ± 0.18             | 6.48 ± 0.04 | 8.36 ± 0.08 | 8.47 ± 0.04 |
| <i>Enterobacteriaceae</i>         | 6.94 ± 0.08             | 6.41 ± 0.05 | 8.32 ± 0.04 | 8.34 ± 0.01 |
| <i>Pseudomonas</i> spp.           | 5.55 ± 0.01             | 5.16 ± 0.04 | 7.46 ± 0.03 | 5.90 ± 0.05 |
| <i>Staphylococcus</i> spp.        | 5.82 ± 0.33             | 5.47 ± 0.05 | 6.80 ± 0.10 | 5.98 ± 0.07 |
| Total anaerobic bacteria          | 6.61 ± 0.09             | 7.09 ± 0.02 | 8.56 ± 0.05 | 7.16 ± 0.01 |
| Yeasts                            | 5.02 ± 0.02             | 6.06 ± 0.06 | 6.82 ± 0.02 | 6.16 ± 0.16 |

Results are expressed as Log of colony-forming units (CFU) per gram of analyzed intestine (Log CFU g<sup>-1</sup>) and are reported as mean ± standard deviation of results obtained from triplicate analysis.

**Table S2:** Pairwise comparisons for richness and diversity estimates among all studied zebrafish groups (C, I, CSE, and CSEpostI) based on Kruskal–Wallis rank sum test.

| Comparisons<br>between groups   | Richness estimates                      |       |                                         |        | Diversity estimates                   |        |                                       |       |
|---------------------------------|-----------------------------------------|-------|-----------------------------------------|--------|---------------------------------------|--------|---------------------------------------|-------|
|                                 | OTU                                     |       | Chao1                                   |        | Simpson                               |        | Shannon                               |       |
|                                 | Z                                       | p     | Z                                       | p      | Z                                     | p      | Z                                     | p     |
| I vs Control                    | 0.75                                    | 1.00  | 0.63                                    | 1.00   | -2.77                                 | 0.017* | -2.74                                 | 0.019 |
| I vs CSEpostI                   | 3.60                                    | 0.001 | 3.62                                    | 0.0009 | -0.50                                 | 1.00   | -0.13                                 | 1.00  |
| Control vs CSEpostI             | 2.85                                    | 0.013 | 2.98                                    | 0.0085 | 2.28                                  | 0.07   | 2.60                                  | 0.028 |
| I vs CSE                        | 0.40                                    | 1.00  | 0.73                                    | 1.00   | -1.24                                 | 0.64   | -1.26                                 | 0.62  |
| Control vs CSE                  | -0.34                                   | 1.00  | 0.096                                   | 1.00   | 1.53                                  | 0.38   | 1.47                                  | 0.42  |
| CSE vs CSEpostI                 | -3.19                                   | 0.004 | -2.89                                   | 0.012  | -0.75                                 | 1.00   | -1.13                                 | 0.78  |
| Kruskal–Wallis<br>rank sum test | $\chi^2 = 16.05$ , df = 3,<br>p = 0.001 |       | $\chi^2 = 15.63$ , df = 3,<br>p = 0.001 |        | $\chi^2 = 8.78$ , df = 3,<br>p = 0.03 |        | $\chi^2 = 9.65$ , df = 3,<br>p = 0.02 |       |

The differences are significant at  $p \leq 0.05$

**Table S3:** Pairwise comparisons among zebrafish groups for genera with the abundance level more than 3% (One-Way PERMANOVA).

| Groups                      | <i>Cetobacterium</i> | <i>Vibrio</i> | ZOR0006     | <i>Shewanella</i> | <i>Flavobacterium</i> | <i>Mycoplasma</i> | <i>Aeromonas</i> | <i>Reyranella</i> | <i>Comamonas</i> | <i>Plesiomonas</i> | <i>Lysobacter</i> |
|-----------------------------|----------------------|---------------|-------------|-------------------|-----------------------|-------------------|------------------|-------------------|------------------|--------------------|-------------------|
| I vs Control                | 0,0001/123,8*        | 0,0002/1,6    | 0,0004/23,3 | 0,001/20,1        | 0,0001/73,3           | 0,008/2,7         | 0,27/1,6         | 0,83/0,05         | 0,002/1,4        | 0,21/1,7           | 0,02/1,6          |
| I vs CSE                    | 0,011/8,2            | 0,5/0,5       | 0,072/3,7   | 0,52/0,4          | 0,01/6,9              | 0,43/1,0          | 0,27/0,8         | 0,067/3,9         | 0,011/4,1        | 0,0062/3,6         | 0,03/2,9          |
| I vs CSEpostI               | 0,0035/12,9          | 0,55/0,3      | 0,0001/10,5 | 0,0006/19,7       | 0,0004/14,0           | 0,035/1,2         | 0,04/5,2         | 0,02/7,1          | 0,0003/3,8       | 0,0002/11,2        | 0,72/0,2          |
| Control vs CSE              | 0,0002/13,7          | 0,0004/1,5    | 0,0001/36,9 | 0,001/17,5        | 0,0001/86,6           | 0,47/1,2          | 0,06/3,0         | 0,09/3,2          | 0,54/0,6         | 0,045/2,9          | 0,0004/3,0        |
| Control vs SEpostI          | 0,0002/8,9           | 0,0001/2,3    | 0,0001/44,8 | 0,0001/41,1       | 0,0001/91,0           | 0,0005/1,2        | 0,009/8,6        | 0,013/6,1         | 0,51/0,3         | 0,0012/10,2        | 0,14/2,1          |
| CSE vs CSEpostI             | 0,56/0,3             | 0,22/1,3      | 0,016/5,2   | 0,085/3,3         | 0,03/5,4              | 0,005/1,2         | 0,33/1,2         | 0,47/0,5          | 0,77/0,1         | 0,20/1,8           | 0,01/3,0          |
| Total sum of squares        | 29760                | 4121          | 9259        | 1257              | 1185                  | 1017              | 2765             | 432,6             | 2270             | 21610              | 3940              |
| Within-group sum of squares | 13500                | 3761          | 2597        | 486,3             | 152,9                 | 925,9             | 2147             | 336,5             | 2050             | 14680              | 3161              |
| F                           | 14,45                | 1,15          | 30,79       | 19,03             | 81,04                 | 1,19              | 3,46             | 3,42              | 1,29             | 5,67               | 2,96              |
| p (same)                    | 0,0001               | 0,32          | 0,0001      | 0,0001            | 0,0001                | 0,0017            | 0,033            | 0,027             | 0,29             | 0,0028             | 0,0015            |

\* p/F; the differences are significant at  $p \leq 0.05$ ; The number of permutations was 9999.

**Table S4:** Thirtythree shared bacterial taxons among zebrafish groups of intestinal content (core microbiome)

| Phylum          | Family                     | Genus                                               |
|-----------------|----------------------------|-----------------------------------------------------|
| Proteobacteria  | <i>Aeromonadaceae</i>      | <i>Aeromonas</i> (8)*                               |
|                 | <i>Beijerinckiaceae</i>    | <i>Bosea</i>                                        |
|                 | <i>Burkholderiaceae</i>    | <i>Comamonas</i> <i>Comamonas</i><br><i>aquatic</i> |
|                 |                            | <i>Cupriavidus</i>                                  |
|                 |                            | <i>Delftia</i>                                      |
|                 |                            | <i>Diaphorobacter</i>                               |
|                 |                            | NI**                                                |
|                 | <i>Desulfovibrionaceae</i> | NI                                                  |
|                 | <i>Enterobacteriaceae</i>  | <i>Plesiomonas</i>                                  |
|                 | <i>Moraxellaceae</i>       | <i>Acinetobacter</i> (2)                            |
|                 |                            | <i>Enhydrobacter</i>                                |
|                 | <i>Pseudomonadaceae</i>    | <i>Pseudomonas</i>                                  |
|                 | <i>Reyranellaceae</i>      | <i>Reyranella</i> (4)                               |
|                 | <i>Rhodobacteraceae</i>    | NI                                                  |
| Actinobacteria  | <i>Nocardiaceae</i>        | <i>Rhodococcus</i>                                  |
| Acidobacteria   | NI                         | NI                                                  |
| Firmicutes      | <i>Erysipelotrichaceae</i> | ZOR0006                                             |
| Planctomycetes  | <i>Pirellulaceae</i>       | NI                                                  |
| Fusobacteria    | <i>Fusobacteriaceae</i>    | <i>Cetobacterium</i>                                |
| Bacteroidetes   | <i>Flavobacteriaceae</i>   | <i>Flavobacterium</i>                               |
| Verrucomicrobia | <i>Pedospaeraceae</i> (2)  | NI                                                  |

\* – the number in parentages is the quantity of different OTUs belonging to the genus;

\*\*NI – the taxon has not identified
